# Supplementary material for: Associations of genetics, behaviors, and life course circumstances with a novel aging and healthspan measure: Evidence from the Health and Retirement Study
Source: PLoS Med. 2019 Jun 18;16(6):e1002827. doi: 10.1371/journal.pmed.1002827 (PMC6581243; doi:10.1371/journal.pmed.1002827)
Supplement: S1 STROBE checklist — (DOC) [file pmed.1002827.s001.doc]

STROBE Statement—checklist of items that should be included in reports of observational studies

Corresponding Author: Morgan Levine

|  | | Item No | Recommendation | Author’s Response |  |  |  | |
| --- | --- | --- | --- | --- | --- | --- | --- | --- |
| **Title and abstract** | | 1 | (*a*) Indicate the study’s design with a commonly used term in the title or the abstract | See the Title. | |  |  |  |
| (*b*) Provide in the abstract an informative and balanced summary of what was done and what was found | See “Methods and Findings” in the Abstract. | |  |  |  |
| Introduction | | | |  | |  |  |  |
| Background/rationale | | 2 | Explain the scientific background and rationale for the investigation being reported | See paragraph 1-3 in Introduction. | |  |  |  |
| Objectives | | 3 | State specific objectives, including any prespecified hypotheses | See paragraph 4 in Introduction. | |  |  |  |
| Methods | | | |  | |  |  |  |
| Study design | | 4 | Present key elements of study design early in the paper | See “Data” in Methods. | |  |  |  |
| Setting | | 5 | Describe the setting, locations, and relevant dates, including periods of recruitment, exposure, follow-up, and data collection | See “Data” in Methods, Fig 1-2, and S1 appendix. | |  |  |  |
| Participants | | 6 | (*a*) *Cohort study*—Give the eligibility criteria, and the sources and methods of selection of participants. Describe methods of follow-up  *Case-control study*—Give the eligibility criteria, and the sources and methods of case ascertainment and control selection. Give the rationale for the choice of cases and controls  *Cross-sectional study*—Give the eligibility criteria, and the sources and methods of selection of participants | See “Data” in Methods, Fig 1-2, and S1 appendix. | |  |  |  |
| (*b*)*Cohort study*—For matched studies, give matching criteria and number of exposed and unexposed  *Case-control study*—For matched studies, give matching criteria and the number of controls per case |  | |  |  |  |
| Variables | | 7 | Clearly define all outcomes, exposures, predictors, potential confounders, and effect modifiers. Give diagnostic criteria, if applicable | See Fig 2, “Childhood and adulthood circumstances”, “Behaviors”, “Genetic factors”, and “PhenoAge and phenotypic aging (PhenoAgeAccel)” in Methods, S1 Table, and S1 appendix. | |  |  |  |
| Data sources/ measurement | | 8* | For each variable of interest, give sources of data and details of methods of assessment (measurement). Describe comparability of assessment methods if there is more than one group | See Fig 2, “Childhood and adulthood circumstances”, “Behaviors”, “Genetic factors”, and “PhenoAge and phenotypic aging (PhenoAgeAccel)” in Methods, S1 Table, and S1 appendix. | |  |  |  |
| Bias | | 9 | Describe any efforts to address potential sources of bias | See paragraph 1-2 in “Statistical analyses” in Methods and S1 appendix. | |  |  |  |
| Study size | | 10 | Explain how the study size was arrived at | See “Data” in Methods and Fig 1. |  |  |  | |
| Quantitative variables | | 11 | Explain how quantitative variables were handled in the analyses. If applicable, describe which groupings were chosen and why | See “Childhood and adulthood circumstances”, “Behaviors”, “Genetic factors”, and “PhenoAge and phenotypic aging (PhenoAgeAccel)” in Methods, S1 Table, and S1 appendix. |  |  |  | |
| Statistical methods | | 12 | (*a*) Describe all statistical methods, including those used to control for confounding | See paragraph 1-2 in “Statistical analyses” in Methods and S1 appendix. |  |  |  | |
| (*b*) Describe any methods used to examine subgroups and interactions | See S1 appendix. |  |  |  | |
| (*c*) Explain how missing data were addressed | See S1 appendix |  |  |  | |
| (*d*) *Cohort study*—If applicable, explain how loss to follow-up was addressed  *Case-control study*—If applicable, explain how matching of cases and controls was addressed  *Cross-sectional study*—If applicable, describe analytical methods taking account of sampling strategy | See S1 appendix |  |  |  | |
| (*e*) Describe any sensitivity analyses |  |  |  |  | |
| Results | | | |  | |  | | |
| Participants | 13* | (a) Report numbers of individuals at each stage of study—eg numbers potentially eligible, examined for eligibility, confirmed eligible, included in the study, completing follow-up, and analysed | | See S1 appendix, and Fig 1. | |  | | |
| (b) Give reasons for non-participation at each stage | | See Fig 1. | |  | | |
| (c) Consider use of a flow diagram | | See Fig 1. | |  | | |
| Descriptive data | 14* | (a) Give characteristics of study participants (eg demographic, clinical, social) and information on exposures and potential confounders | | See paragraph 1-2 in Results and Table 1. | |  | | |
| (b) Indicate number of participants with missing data for each variable of interest | |  | |  | | |
| (c) *Cohort study*—Summarise follow-up time (eg, average and total amount) | |  | |  | | |
| Outcome data | 15* | *Cohort study*—Report numbers of outcome events or summary measures over time | | See paragraph 2 in Results. | |  | | |
| *Case-control study—*Report numbers in each exposure category, or summary measures of exposure | |  | |  | | |
| *Cross-sectional study—*Report numbers of outcome events or summary measures | |  | |  | | |
| Main results | 16 | (*a*) Give unadjusted estimates and, if applicable, confounder-adjusted estimates and their precision (eg, 95% confidence interval). Make clear which confounders were adjusted for and why they were included | | See Results, Table 2, Fig 3-5. | |  | | |
| (*b*) Report category boundaries when continuous variables were categorized | |  | |  | | |
| (*c*) If relevant, consider translating estimates of relative risk into absolute risk for a meaningful time period | |  | |  | | |
| Other analyses | 17 | Report other analyses done—eg analyses of subgroups and interactions, and sensitivity analyses | | See S1 appendix. | |  | | |
| Discussion | | | |  | |  | | |
| Key results | 18 | Summarise key results with reference to study objectives | | See paragraph 1 and 8 in Discussion. | |  | | |
| Limitations | 19 | Discuss limitations of the study, taking into account sources of potential bias or imprecision. Discuss both direction and magnitude of any potential bias | | See paragraph 6 in Discussion. | |  | | |
| Interpretation | 20 | Give a cautious overall interpretation of results considering objectives, limitations, multiplicity of analyses, results from similar studies, and other relevant evidence | | See Discussion. | |  | | |
| Generalisability | 21 | Discuss the generalisability (external validity) of the study results | | See Discussion. | |  | | |
| Other information | | | |  | |  | |  |
| Funding | 22 | Give the source of funding and the role of the funders for the present study and, if applicable, for the original study on which the present article is based | | See information in the “Financial Disclosure” field in the submission form. | |  | | |

*Give information separately for cases and controls in case-control studies and, if applicable, for exposed and unexposed groups in cohort and cross-sectional studies.

**Note:** An Explanation and Elaboration article discusses each checklist item and gives methodological background and published examples of transparent reporting. The STROBE checklist is best used in conjunction with this article (freely available on the Web sites of PLoS Medicine at http://www.plosmedicine.org/, Annals of Internal Medicine at http://www.annals.org/, and Epidemiology at http://www.epidem.com/). Information on the STROBE Initiative is available at www.strobe-statement.org.
